# Supplementary material for: Stock-outs of antiretroviral and tuberculosis medicines in South Africa: A national cross-sectional survey
Source: PLoS One. 2019 Mar 12;14(3):e0212405. doi: 10.1371/journal.pone.0212405 (PMC6413937; doi:10.1371/journal.pone.0212405)
Supplement: S1 Dataset — (XLSX) [file pone.0212405.s002.xlsx]

## Sheet: Data
		ARV/TB Stockouts Today																													Stockout ARV/TB medicine in the previous 3 months
			Stockout #1				Stockout #2				Stockout #3				Stockout #4				Stockout #5				Stockout #6				Stockout #7					Stockout #1				Stockout #2				Stockout #3				Stockout #4				Stockout #5
province_code	date_called	ARV/TB Stockout Today	Name of ARV/TB	Length of Stockout	Patient Impact	Supply Given	Name of ARV/TB	Length of Stockout	Patient Impact	Supply Given	Name of ARV/TB	Length of Stockout	Patient Impact	Supply Given	Name of ARV/TB	Length of Stockout	Patient Impact	Supply Given	Name of ARV/TB	Length of Stockout	Patient Impact	Supply Given	Name of ARV/TB	Length of Stockout	Patient Impact	Supply Given	Name of ARV/TB	Length of Stockout	Patient Impact	Supply Given	ARV/TB Stockout Previous 3 months	Name of ARV/TB	Length of Stockout	Patient Impact	Supply Given	Name of ARV/TB	Length of Stockout	Patient Impact	Supply Given	Name of ARV/TB	Length of Stockout	Patient Impact	Supply Given	Name of ARV/TB	Length of Stockout	Patient Impact	Supply Given	Name of ARV/TB	Length of Stockout
1	2015-10-04	0																													0
1	2015-10-04	0																													0
1	2015-10-05	1	26	1	4	2																									0
1	2015-10-05	1	17	3	4	3																									1	17	3	4	3
1	2015-10-05	0																													0
1	2015-10-05	0																													0
1	2015-10-05	0																													1	9	2	4	3
1	2015-10-05	1	34	3	4	3																									1	34	3	4	3
1	2015-10-05	0
1	2015-10-05	0																													0
1	2015-10-05	0																													0
1	2015-10-05	0																													0	20	2	4	3
1	2015-10-05	0																													0
1	2015-10-05	1	14	1	4	3																									0
1	2015-10-05	0																													0
1	2015-10-05	0																													0
1	2015-10-05	0																													0
1	2015-10-05	1	14	2	3																										0
1	2015-10-05	1	14	2	3	3																									0
1	2015-10-05	0																													0
1	2015-10-05	0																													0
1	2015-10-05	0																													1	9	1	4	3
1	2015-10-05	0																													1	9	1	5	2
1	2015-10-05	0																													0
1	2015-10-05	0																													0
1	2015-10-05	1	9	2	2	3																									0
1	2015-10-05	0																													0
1	2015-10-05	0																													0
1	2015-10-05	0																													0
1	2015-10-05	0																													0
1	2015-10-05	1	4	3	4	2																									1	4	3	5	2
1	2015-10-06	0																													0
1	2015-10-06	0																													0
1	2015-10-06	0																													0
1	2015-10-06	0																													1	22	3	4	2
1	2015-10-06	0																													0
1	2015-10-06	0																													0
1	2015-10-06	0																													0
1	2015-10-06	0																													0
1	2015-10-06	0																													0
1	2015-10-06	0																													0
1	2015-10-06	0																													1	14	3	4	3
1	2015-10-06	0																													0
1	2015-10-06	1	31	3	1	1																									0
1	2015-10-06	1	14	1	4	3																									0
1	2015-10-06	0																													0
1	2015-10-06	1	14	3	2	3																									0
1	2015-10-06	0																													0
1	2015-10-06	0																													0
1	2015-10-06	0																													0
1	2015-10-06	1	9	1	4	2																									1	9	2	4	3
1	2015-10-06	0																													0
1	2015-10-06	1	30	2	3	2																									0
1	2015-10-06	0																													1	14	3	2	3
1	2015-10-06	0																													0
1	2015-10-06	0																													0
1	2015-10-07	0																													0
1	2015-10-07	0																													0
1	2015-10-07	0																													0
1	2015-10-07	0																													0
1	2015-10-07	0																													0
1	2015-10-07	0																													1	27	3	2	3
1	2015-10-07	0																													0
1	2015-10-07	0																													1	9	3	4	3
1	2015-10-07	1	24	1	4	3																									0
1	2015-10-07	0																													0
1	2015-10-07	1	27	3	3	3	5	1	1	1																					0
1	2015-10-07	1	21	3	4	3																									0
1	2015-10-07	0																													0
1	2015-10-07	0																													0
1	2015-10-07	0																													0
1	2015-10-07	0																													0
1	2015-10-07	0																													0
1	2015-10-07	1	22	1	4	2																									0
1	2015-10-07	0																													0
1	2015-10-07	0																													0
1	2015-10-07	0																													0
1	2015-10-07	1	6	1	1	1																									1	6	2	1	1
1	2015-10-07	1	14	3	4	3																									0
1	2015-10-07	0																													0
1	2015-10-08	0																													1	34	3	4	3
1	2015-10-08	0																													1	28	3	3	3
1	2015-10-08	0																													0
1	2015-10-08	0																													0
1	2015-10-08	0																													0
1	2015-10-08	0																													1	30	3	4	3
1	2015-10-08	0																													0
1	2015-10-08	0																													1	14	3	2	3
1	2015-10-08	0																													0
1	2015-10-08	0																													0
1	2015-10-08	0																													0
1	2015-10-08	0																													1
1	2015-10-08	0																													0
1	2015-10-08	0																													0
1	2015-10-08	0																													0
1	2015-10-08	0																													0
1	2015-10-08	0																													1	17	2	3	3
1	2015-10-08	0																													0
1	2015-10-08	0																													1	17	2	4	3
1	2015-10-08	0																													0
1	2015-10-08	0																													0
1	2015-10-08	1	6	1	4	2																									0
1	2015-10-08	0																													0
1	2015-10-08	0																													1	14	3	4	3
1	2015-10-08	0																													0
1	2015-10-08	0																													0
1	2015-10-08	1	9	3	1	1																									0
1	2015-10-09	0																													0
1	2015-10-09	0																													1	4	2	4	3
1	2015-10-09	0																													0
1	2015-10-09	0																													0
1	2015-10-09	0																													0
1	2015-10-09	0																													1	4	3	4	2
1	2015-10-09	0																													0
1	2015-10-09	0																													0
1	2015-10-09	0																													0
1	2015-10-09	0																													0
1	2015-10-09	0																													0
1	2015-10-09	0																													0
1	2015-10-09	0																													0
1	2015-10-09	0																													1	29	2	4	3	9	2	4	3
1	2015-10-09	0																													0
1	2015-10-09	0																													0
1	2015-10-09	0																													0
1	2015-10-09	0																													0
1	2015-10-09	0																													0
1	2015-10-09	0																													1	4	2	4	3
1	2015-10-09	0																													0
1	2015-10-09	0																													0
1	2015-10-09	0																													0
1	2015-10-09	0																													0
1	2015-10-09	0																													0
1	2015-10-09	0																													0
1	2015-10-09	0																													0
1	2015-10-09	0																													0
1	2015-10-09	0																													0
1	2015-10-12	0																													0
1	2015-10-12	1	11	3	4	3																									0
1	2015-10-12	0																													0
1	2015-10-12	0																													0
1	2015-10-12	0																													0
1	2015-10-12	1	14	3	2	3																									1	14	3	2	3
1	2015-10-12	0																													0
1	2015-10-12	0																													0
1	2015-10-12	0																													0
1	2015-10-12	0																													0
1	2015-10-12	0																													0
1	2015-10-12	0																													0
1	2015-10-12	0																													1
1	2015-10-12	1	17	2	4	3																									0
1	2015-10-12	0																													0
1	2015-10-12	1	21	2	1	1																									1	21
1	2015-10-12	0																													0
1	2015-10-12	0																													0
1	2015-10-12	1	4	2	4	3																									0
1	2015-10-12	0																													0
1	2015-10-14	1	33	3	4	3																									1	4	2	4	3
1	2015-10-14	1	18	1	4	3																									0
1	2015-10-14	0																													0
1	2015-10-14	0																													0
1	2015-10-14	0																													0
1	2015-10-14	0																													0
1	2015-10-14	0																													0
1	2015-10-14	0																													0
1	2015-10-14	1	14	3	4	3																									0
1	2015-10-14	0																													1	14	2	4	3
1	2015-10-14	0																													0
1	2015-10-14	1	22	2	2	3																									0
1	2015-10-14	0																													0
1	2015-10-14	0																													0
1	2015-10-14	1	14	3	1	1																									0
1	2015-10-14	0																													0
1	2015-10-14	0																													0
1	2015-10-14	0																													0
1	2015-10-14	0																													0
1	2015-10-14	0																													0
1	2015-10-14	0																													0
1	2015-10-14	0																													0
1	2015-10-14	0																													0
1	2015-10-14	1	3	1	4	3	17	1	4	3	14	1	4	3																	0
1	2015-10-14	0																													0
1	2015-10-14	0																													1	14	1	4	3
1	2015-10-14	0																													1	31	2	4	3
1	2015-10-14	1	8	2	1	1																									0
1	2015-10-15	0																													1	14	3	2	3
1	2015-10-15	0																													0
1	2015-10-15	0																													0
1	2015-10-15	0																													0
1	2015-10-15	0																													0
1	2015-10-15	1	41	1	4																										0
1	2015-10-15	0																													0
1	2015-10-15	0																													0
1	2015-10-15	0																													0
1	2015-10-15	0																													0
1	2015-10-15	0																													0
1	2015-10-15	0																													1	9	3	4	3
1	2015-10-15	0																													0
1	2015-10-15	0																													0
1	2015-10-15	0																													0
1	2015-10-15	0																													0
1	2015-10-15	0																													0
1	2015-10-15	0																													0
1	2015-10-15	0																													0
1	2015-10-15	0																													0
1	2015-10-15	0																													0
1	2015-10-15	0																													0
1	2015-10-15	0																													1	4	1	4	3
1	2015-10-15	1	4	1	4	3																									0
1	2015-10-15	0																													0
1	2015-10-15	0																													0
1	2015-10-16	0																													0
1	2015-10-16	0																													0
1	2015-10-16	0																													0
1	2015-10-16	0																													0
1	2015-10-16	0																													0
1	2015-10-16	0																													0
1	2015-10-16	0																													0
1	2015-10-16	0																													0
1	2015-10-16	0																													0
1	2015-10-16	0																													0
1	2015-10-16	0																													0
1	2015-10-16	0																													0
1	2015-10-16	0																													0
1	2015-10-16	0																													1	14	3	4	3
1	2015-10-16	0																													1	9	3	4	3
1	2015-10-16	0																													0
1	2015-10-16	0																													0
1	2015-10-16	0																													0
1	2015-10-16	0																													0
1	2015-10-16	0																													0
1	2015-10-16	0																													1	9	2	4	3
1	2015-10-16	0																													1	9	2	4	3
1	2015-10-16	0																													0
1	2015-10-16	0																													1	4	3	4	3
1	2015-10-16	0																													0
1	2015-10-16	0																													0
1	2015-10-16	1	14	3	1	1																									1	28	2	1	1
1	2015-10-19	1	14	2	4	3																									0
1	2015-10-19	0																													0
1	2015-10-19	1	20	2	4	3																									0
1	2015-10-19	0																													0
1	2015-10-19	0																													0
1	2015-10-19	0																													0
1	2015-10-19	0																													0
1	2015-10-19	1	4	1	4	3																									0
1	2015-10-19	0																													0
1	2015-10-19	0																													0
1	2015-10-19	0																													0
1	2015-10-19	0																													0
1	2015-10-19	0																													1	9	2	4	3
1	2015-10-19	0																													0
1	2015-10-19	0																													0
1	2015-10-19	0																													0
1	2015-10-19	0																													0
1	2015-10-19	0																													0
1	2015-10-19	0																													0
1	2015-10-19	0																													0
1	2015-10-19	0																													0
1	2015-10-19	0																													0
1	2015-10-19	0																													0
1	2015-10-19	0																													0
1	2015-10-19	0																													1	13	1	4	3	6	2	4	3	25	2	4	3
1	2015-10-19	0																													0
1	2015-10-19	0																													1	4	1	4	3
1	2015-10-19	0																													0
1	2015-10-19	1	17	3	4	3	2	2	4	3																					1	30	3	3	3
1	2015-10-19	0	42	3	4	3																									0
1	2015-10-19	1	4	2	4	3																									0
1	2015-10-19	1	6	1	1	1																									0
1	2015-10-20	0																													0
1	2015-10-20	0																													0
1	2015-10-20	0																													1	5	3	4	3
1	2015-10-20	0																													0
1	2015-10-20	0																													0
1	2015-10-20	0																													0
1	2015-10-20	1	9	2	4	3																									0
1	2015-10-20	0																													0
1	2015-10-20	1	14	1	1	1																									0
1	2015-10-20	0																													0
1	2015-10-20	0																													0
1	2015-10-20	1	4	1	4	3																									0
1	2015-10-20	0																													0
1	2015-10-20	0																													0
1	2015-10-20	0																													0
1	2015-10-20	0																													1	4	2	4	3
1	2015-10-20	1	30	3	4	3																									1	30	3	4	3
1	2015-10-20	1	14	2	2	3																									0
1	2015-10-20	1	9	3	1	1																									0
1	2015-10-20	0																													0
1	2015-10-20	0																													0
1	2015-10-20	0																													1	41	1	4	3
1	2015-10-20	1	14	1	4	3																									0
1	2015-10-20	0																													0
1	2015-10-21	1	14	3	4	3																									1	4	3	4	3
1	2015-10-21	0																													1	14	3	4	3
1	2015-10-21	0																													0
1	2015-10-21	0																													0
1	2015-10-21	0																													0
1	2015-10-21	0																													0
1	2015-10-21	0																													0
1	2015-10-21	0																													0
1	2015-10-21	1	14	2	4	3																									0
1	2015-10-21	0																													0
1	2015-10-21	0																													0
1	2015-10-21	0																													1	9	2	2	3
1	2015-10-21	0																													1	21	2	1	1
1	2015-10-21	1	1	1	4	3																									1	1
1	2015-10-21	1	14	1	4	3																									1	9	3	2	3
1	2015-10-21	0																													0
1	2015-10-21	0																													0
1	2015-10-21	0																													0
1	2015-10-21	0																													0
1	2015-10-21	1	4	1	4	3																									0
1	2015-10-22	1	17	3	4	3																									1	17	2	4	3
1	2015-10-22	1	25	3	1	1	14	3	2	3																					1	25	3	1	1	14	3	2	3
1	2015-10-22	0																													1	25	3	4	3
1	2015-10-22	0																													0
1	2015-10-22	0																													0
1	2015-10-22	0																													0
1	2015-10-22	0																													0
1	2015-10-22	0																													0
1	2015-10-22	0																													0
1	2015-10-22	0																													0
1	2015-10-22	0
1	2015-11-03	0																													0
1	2015-11-04	0																													0
1	2015-11-04	0																													0
1	2015-11-04	0																													0
1	2015-11-04	0																													1	6		4	3
1	2015-11-04	0																													0
1	2015-11-04	0																													0
1	2015-11-04	0																													0
1	2015-11-04	0																													0
1	2015-11-04	0																													0
1	2015-11-04	1	14	2	4	3																									0
1	2015-11-04	0																													0
1	2015-11-04	0																													0
1	2015-11-04	0																													0
1	2015-11-04	0																													0
1	2015-11-04	0																													0
1	2015-11-04	0																													0
1	2015-11-04	0																													1	9	3	4	3
1	2015-11-04	1	33	3	1	1																									0
1	2015-11-05	0																													0
1	2015-11-05	0																													0
1	2015-11-05	0																													0
1	2015-11-05	0																													0
1	2015-11-05	1	9	1	4	3																									0
1	2015-11-05	0																													0
1	2015-11-05	0																													0
1	2015-11-05	0																													0
1	2015-11-05	0																													1	6	2	4	3
1	2015-11-05	1	14	2	4	3																									0
1	2015-11-05	1	14	2	1	1																									0
1	2015-11-05	0																													0
1	2015-11-05	0																													0
1	2015-11-05	0																													0
1	2015-11-05	0																													0
1	2015-11-05	0																													0
1	2015-11-05	0																													0
1	2015-11-05	0																													0
1	2015-11-05	1	28	3	2	3	41	2	4	3																					0
1	2015-11-05	1	29	1	1	1																									0	4	2	4	3
1	2015-11-05	0																													0
1	2015-11-05	0																													0
1	2015-11-05	0																													0
1	2015-11-06	1	14	1	3	3																									1	4	2	4	3
1	2015-11-06	0																													1	14	1	4	3
1	2015-11-06	1	9	1	4	3																									0
1	2015-11-06	0																													0
1	2015-11-06	0																													0
1	2015-11-06	0																													0
1	2015-11-06	0																													0
1	2015-11-06	0																													1	21	3	1	1
1	2015-11-06	0																													0
1	2015-11-06	0																													0
1	2015-11-06	0																													0
1	2015-11-06	1	11	2	2	3																									0
1	2015-11-06	0																													0
1	2015-11-06	0																													0
1	2015-11-06	0																													0
1	2015-11-06	0																													1	14	3	2	3
1	2015-11-06	1	17	1	4	3																									0
1	2015-11-06	0																													0
1	2015-11-06	0																													0
1	2015-11-06	0																													0
1	2015-11-06	0																													0
1	2015-11-09	1	4	1	4	3																									0
1	2015-11-09	0																													1	6	2	1	1
1	2015-11-09	0																													0
1	2015-11-09	0																													0
1	2015-11-09	0																													0
1	2015-11-09	0																													1	9	1	4	3
1	2015-11-09	0																													0
1	2015-11-09	0																													0
1	2015-11-09	0																													0
1	2015-11-09	0																													0
1	2015-11-09	1	13	1	4	3																									0
1	2015-11-09	0																													1	9		2	3
1	2015-11-09	1	17	2	4	3																									0
1	2015-11-09	0																													0
1	2015-11-09	0																													1	14	3	4	3
1	2015-11-09	0																													0
1	2015-11-09	1	9	2	4	3																									1	9
1	2015-11-09	0																													0
1	2015-11-09	0																													0
1	2015-11-09	0																													0
1	2015-11-09	0																													0
1	2015-11-09	0																													0
1	2015-11-09	0																													1	29	2	1	1
1	2015-11-09	0																													0
1	2015-11-09	0																													0
1	2015-11-09	0																													0
1	2015-11-09	0																													1	17	2	4	3
1	2015-11-09	1	14	2	1	1																									0
1	2015-11-11	0																													0
1	2015-11-13	0																													0
1	2015-11-13	0																													1	9	2	2	3
1	2015-11-13	0																													1	28	2	4	3	9	2	4	3
1	2015-11-13	0																													0
1	2015-11-13	0																													0
1	2015-11-13	1	13	1	4	3																									0
1	2015-11-13	0																													1	9	2	4	2	6	2	4	2
1	2015-11-13	0																													1	4	3	4	3
1	2015-11-13	0																													0
1	2015-11-13	1	99	1	3	3	28	1	4	3																					0
1	2015-11-13	0																													0
1	2015-11-16	0																													1	26	1	4	3
1	2015-11-16	1	17	1	1	1	21	3	1	1																					0
1	2015-11-16	0																													0
1	2015-11-16	0																													1	4	1	4	3	6	3	4	3
1	2015-11-16	0																													0
1	2015-11-16	0																													0
1	2015-11-16	0																													0
1	2015-11-16	1	42	3	1	1																									1	3	3	4	3
1	2015-11-16	0																													1	9	2	4	3
1	2015-11-16	0																													0
1	2015-11-16	0																													1	14	3	2	3
1	2015-11-16	0																													0
1	2015-11-16	0																													1	17	3	4	3
1	2015-11-16	1	8	3	1	1																									0
1	2015-11-17	0																													1	21	2	4	3
1	2015-11-17	0																													0
1	2015-11-17	1	9	1	4	3																									0
1	2015-11-17	1	28	2	4	3																									0
1	2015-11-17	0																													0
1	2015-11-17	0																													0
1	2015-11-17	0																													0
1	2015-11-17	0																													0
1	2015-11-17	0																													0
1	2015-11-18	1	25	3	4	3																									0
1	2015-11-18	0																													0
1	2015-11-18	0																													0
1	2015-11-18	0																													0
1	2015-11-18	0																													1	5	2	4	3
1	2015-11-18	1	17	2	4	3	8	1	1	1																					0
1	2015-11-18	0																													0
1	2015-11-18	0																													0
1	2015-11-18	0																													0
1	2015-11-19	0																													0
1	2015-11-19	0																													1	6	2	4	3
1	2015-11-19	0																													0
1	2015-11-19	0																													0
1	2015-11-19	0																													0
1	2015-11-19	0																													1	4	2	4	3
2	2015-10-14	0																													0
2	2015-10-14	1	9	3	2	3	8	3	2	3																					1	9	3	4	1	8	3	4	1
2	2015-10-15	1	15	2	2	3																									1	9	2	1	1	18	2	1	1	14	2	1	1	21	2	1	1
2	2015-10-15	0																													1	9	3	4	3
2	2015-10-15	0																													0
2	2015-10-15	0																													0
2	2015-10-15	1	8	2	4	2	9	3	5	3	26	3	4	2	17	3	4	2	6	2	4	2	14	3	4	2					1	14	3	4	2	17	3	4	2	26	3	4	2	9	3	5	3
2	2015-10-15	0																													0
2	2015-10-15	0																													0
2	2015-10-15	1	9	2	4	3	8	2	4	3	6	2	4	3																	0
2	2015-10-15	0																													0
2	2015-10-15	0																													1	29	3	3	2
2	2015-10-15	0																													0
2	2015-10-15	1	14	2	2	3	8	2	2	3																					0
2	2015-10-15	0																													0
2	2015-10-15	0																													0
2	2015-10-15	1	4	2	1	1																									0
2	2015-10-15	0																													0
2	2015-10-15	1	9	2	2	3	28	2	4	3	4	2	2	3																	0
2	2015-10-15	0	7	3	1	2																									0
2	2015-10-15	0																													0
2	2015-10-15	0																													1	9	2	1	1	8	2	1	1
2	2015-10-16	0																													1	32	2	4	3
2	2015-10-16	1	9	3	1	1	21	2	1	1	6	2	1	1																	1	9	3	1	1
2	2015-10-16	1	9	3	2	3	14	3	2	3																					0
2	2015-10-16	1	9	3	3	2	6	3	3	2																					1	9	3	3	2
2	2015-10-16	1	14	2	2	3																									0
2	2015-10-16	0																													1	9	2	4	3
2	2015-10-16	1	9	2	2	3																									0
2	2015-10-16	0																													0
2	2015-10-16	0																													1	14	2	4	3
2	2015-10-16	1	6	2	2	3																									1	9	3	3	2
2	2015-10-16	0																													0
2	2015-10-16	1	14	3	1	1	6	3	1	1	9	3	1	1																	1	9	3	1	1
2	2015-10-16	1	4	2	4	3																									1	4	3	4	3
2	2015-10-16	1	2	2	3	2	26	2	3	2																					1	9	3	1	1
2	2015-10-16	0																													0
2	2015-10-16	0																													0
2	2015-10-16	1	8	3	1	1	14	3	4	3	15	3	1	1																	1	15	3	1	1	8	3	1	1
2	2015-10-16	1	9	2	1	1																									1	9	3	1	1
2	2015-10-19	0																													0
2	2015-10-19	0																													0
2	2015-10-19	0																													1	9	3	2	3
2	2015-10-19	0																													1	9	3	1	1
2	2015-10-19	0																													0
2	2015-10-19	0																													0
2	2015-10-19	0																													1	8	3	1	1	14	3	1	1
2	2015-10-19	0																													0
2	2015-10-19	0																													1	9	2	2	3
2	2015-10-19	0																													0
2	2015-10-19	0																													0
2	2015-10-19	0																													0
2	2015-10-19	0																													0
2	2015-10-19	1	2	1	4	1	8	1	2	3																					1	9	3	2	3
2	2015-10-19	0																													0
2	2015-10-19	0																													0
2	2015-10-19	0																													0
2	2015-10-19	0																													0
2	2015-10-19	1	9	3	2	3	4	2	2	3	8	2	4	3																	1	9	3	2	3
2	2015-10-19	1	9	3	2	3	28	2	2	3	14	3	3	3																	1	9	3	2	3	28	1	2	3	14	3	2	3
2	2015-10-19	0																													1	9	2	2	3
2	2015-10-20	1	14	3	3	2	6		3	2																					1	21	3	1	1
2	2015-10-20	1	9	1	2	3	22	1	2	3	21	1	1	1																	0
2	2015-10-20	0																													0
2	2015-10-20	0																													0
2	2015-10-20	1	9	2	2	3																									0
2	2015-10-20	0																													0
2	2015-10-20	1	30	1	1	1	29	1	1	1																					0
2	2015-10-20	0																													0
2	2015-10-20	0																													0
2	2015-10-20	1	30	2	1	1																									1	14	2	2	3
2	2015-10-20	0																													0
2	2015-10-20	0																													0
2	2015-10-20	1	9	2	1	1																									0
2	2015-10-20	1	4	2	4	3	32	2	4	3																					0
2	2015-10-20	1	9	3	2	2	18	3	1	1																					1	9	3	2	2	8	3	1	1
2	2015-10-20	0																													0
2	2015-10-20	0																													0
2	2015-10-20	1	9	3	1	1																									1	9	3	1	1
2	2015-10-20	1	9	2	1	1																									0
2	2015-10-20	0																													0
2	2015-10-20	0																													0
2	2015-10-20	1	14	2	1	1																									1	9	3	1	1	6	3	1	1	14	3	1	1	28	3	2	3	17	3
2	2015-10-20	0																													1	9	3	3	2
2	2015-10-20	0																													0
2	2015-10-21	0																													0
2	2015-10-21	1	14	2	1	1	9	2	1	1	21	2	1	1																	0
2	2015-10-21	1	14	3	4	3	8	2	4	3	6	2	3	2																	1	8	3	4	3
2	2015-10-21	0																													0
2	2015-10-21	1	9	3	2	3																									1	17	1	4	3	15	2	4	3
2	2015-10-21	1	4	3	3	2	13	3	4	3	8	3	4	3	6	3	4	3	2	3	4	3	9	3	4	3	20	3	4	3	1	4	3	3	2	13	3	4	3	8	3	4	3	20	3	4	3	6	3
2	2015-10-21	1	9	3	4	3																									0
2	2015-10-21	1	9	2	2	3																									0
2	2015-10-21	0																													0
2	2015-10-21	0																													0
2	2015-10-21	0																													0
2	2015-10-21	0																													1	14	3	4	3
2	2015-10-21	0																													0
2	2015-10-21	0																													0
2	2015-10-21	1	40	2	1	1	13	2	1	1	14	2	1	1																	0
2	2015-10-21	0																													0
2	2015-10-21	1	6	3	4	3	23	3	4	3	25	3	4	3	13	3	4	3	18	3	4	3									1	6	3	4	3	18	3	4	3	13	3	4	3	23	3	4	3	25	3
2	2015-10-21	0																													0
2	2015-10-21	1	41	2	4	3	8	3	4	3	6	2	4	3	29	2	4	3													1	4	3	4	3	25	3	4	3	8	3	4	3
2	2015-10-21	0																													0
2	2015-10-21	0																													0
2	2015-10-21	1	4	2	4	3	17	2	4	3	8	2	4	3	6	2	4	3													0
2	2015-10-21	1	4	2	3	2	22	2	2	3	2	2	3	2	6	2	2	3													1	2	3	3	2
2	2015-10-21	0																													0
2	2015-10-22	0																													0
2	2015-10-22	0																													0
2	2015-10-22	1	22	2	2	3																									0
2	2015-10-22	1	4	3	4	3	13	3	4	3	8	3	4	3																	1	9	2	4	3	8	3	4	3
2	2015-10-22	1	9	3	4	3																									0
2	2015-10-22	0																													0
2	2015-10-22	0																													1	8	2	2	3
2	2015-10-22	0																													0
2	2015-10-22	1	9	3	2	3																									1	8	3	3	2	14	3	3	2
2	2015-10-22	0																													0
2	2015-10-22	1	6	2	2	3																									1	9	3	2	3
2	2015-10-22	1	13	1	4	3																									0
2	2015-10-22	1	5	3	4	3																									0
2	2015-10-23	1	8	2	3	2																									0
2	2015-10-23	1	31	2	4	3	9	2	4	3	8	2	4	3	6	2	4	3													1	14	3	4	3	21	3	4	3	17	3	2	3
2	2015-10-23	0																													0
2	2015-10-23	1	9	3	2	3																									1	9	3	2	3
2	2015-10-23	0																													0
2	2015-10-23	0																													0
2	2015-10-23	1	9	3	1	1	20	3	1	1	6	3	1	1	14	3	1	1													1	9	3	1	1	20	3	1	1	14	3	1	1	6	3	1	1
2	2015-10-26	0																													1	9	3	3	2
2	2015-10-26	0																													0
2	2015-10-26	1	14	2	4	3																									1	37	3	4	3
2	2015-11-17	0																													0
2	2015-11-17	1	14	2	4	3	31	2	4	3	21	2	4	3	8	2	4	3	6	3	4	3									1	29	2	4	3	6	2	4	3	9	3	4	3
2	2015-11-17	0																													0
3	2015-10-05	0																													1	9	2	4	2
3	2015-10-05	0																													1	9	3	4	3
3	2015-10-05	1	9	3	4	2																									1	9	3	4	2
3	2015-10-05	1	9	3	4	2	6	3	4	2																					1	9	3	4	2	6	3	4	2
3	2015-10-05	1	17	3	1	1	20	3	2	3	9	3	1	1
3	2015-10-05	0																													0
3	2015-10-05	1	9	3	2	2																									1	9	3	2	2
3	2015-10-05	0																													0
3	2015-10-05	0																													0
3	2015-10-05	0																													0
3	2015-10-05	1	9	3	4	2																									1	9	3	4	2
3	2015-10-05	1	9	3	2	2	21	2	4	2																					0
3	2015-10-05	1	9	3	4	2	21	2	2	3																					1	9	3	4	2
3	2015-10-05	0																													0
3	2015-10-05	0																													0
3	2015-10-05	0																													0
3	2015-10-06	0																													1	9	1	2	2
3	2015-10-06	0																													0
3	2015-10-06	1	22	1	2																										0	9	3	2	2
3	2015-10-06	0																													1	31	3	1	1
3	2015-10-06	1	9	3	1	1	5	3	2	2																					1	9	3	1	1	5	3	2	2
3	2015-10-06	1	16	3	4	2	12	1	1	1																					1	16	3	4	2	12	1	1	1
3	2015-10-06	0																													0
3	2015-10-06	0																													1	9	1	1	1
3	2015-10-06	1	18	1	5	2																									1	17	3	4	2
3	2015-10-06	0																													0
3	2015-10-06	0																													1	8	3	3	2
3	2015-10-07	0																													1	9	3	3	2
3	2015-10-07	1	9	3	4	2
3	2015-10-07	1	9	3	4	2	14	3	2	3																					1	21	3	4	2
3	2015-10-07	1	9	3	2	2																									0
3	2015-10-07	0																													0
3	2015-10-07	0																													0
3	2015-10-07	0																													1	9	3	4	3
3	2015-10-07	0																													0
3	2015-10-07	0																													1	14	3	2	2
3	2015-10-07	0																													1	14	3	4	3
3	2015-10-07	0																													0
3	2015-10-07	0																													1	31	3	4	2
3	2015-10-07	0																													0
3	2015-10-07	0																													1	14	1	2	3
3	2015-10-07	0																													0
3	2015-10-07	1	14	2	4	2	9	1	4	2																					1	9	3	3	2
3	2015-10-07	1	1	1	2	2	4	1	3	2	14	3	4	2																	0
3	2015-10-07	1	14	3	2	2																									0
3	2015-10-07	1	17	3	3	3																									1	14	3	3	3
3	2015-10-07	1	6	2	1	1																									1	4	2	3	2	14	2	3	2
3	2015-10-07	0																													0
3	2015-10-07	0																													0
3	2015-10-07	0																													1	9	2	1	1
3	2015-10-09	1	22	3	2	2	14	3	2	3																					1	9	3	2	2	14	3	3	2
3	2015-10-09	0																													1	11	3	4	2
3	2015-10-09	1	9	3	1	1																									1	9	3	1	1
3	2015-10-09	1	9	3	4	2																									1	9	3	4	2
3	2015-10-09	1	9	1	4	1																									0
3	2015-10-09	0																													0
3	2015-10-09	1	12	1	3	2	9	1	4	2																					1	9	1	4	2
3	2015-10-09	0																													0
3	2015-10-09	0																													1	9	1		2
3	2015-10-09	1	9	1	4	2	13	1	4	1																					1	14	2	4	3
3	2015-10-09	1	14	3	1	2																									1	6	3	3	3
3	2015-10-09	0																													1	14	3	2	2
3	2015-10-09	1	9	1	4	2																									0
3	2015-10-09	0																													0
3	2015-10-09	1	20	3	3	2	9	3	1	2																					1		3	3	2
3	2015-10-09	0																													0
3	2015-10-09	0																													0
3	2015-10-09	0																													0
3	2015-10-09	1	6	2	3	2																									1	6	2	3	2
3	2015-10-09	0																													0
3	2015-10-09	1	6	3	2	2																									0
3	2015-10-12	1	9	3	4	2																									0
3	2015-10-12	0																													0
3	2015-10-12	0																													0
3	2015-10-12	0																													0
3	2015-10-12	0																													0
3	2015-10-12	0																													0
3	2015-10-12	1	9	2	4	3																									1	14	3	2	3
3	2015-10-12	1	3	2	1	1	9	3	4	3	6	1	4	2																	0
3	2015-10-12	0																													0
3	2015-10-12	1	24	2	2	2																									0
3	2015-10-12	1	14	1	3	3	6	2	4	3																					1	22	3	1	1	14	3	2	3
3	2015-10-12	0																													0
3	2015-10-12	0																													0
3	2015-10-12	1	22	2	4	2	12	3	2																						1	99	3	1	1
3	2015-10-12	0																													0
3	2015-10-13	1	9	3	1	1																									0
3	2015-10-13	1	9	3	2	3
3	2015-10-13	0																													1	35	3	4	3
3	2015-10-13	1	41	3	3	3																									0
3	2015-10-13	0																													1	9	3	4	2
3	2015-10-13	1	9	2	3	2																									1	9	2	3	2
3	2015-10-13	0																													0
3	2015-10-13	1	24	3	4	3	22	3	3	2																					1	35	3	4	2	17	3	4	2	29	3	4	2
3	2015-10-13	0																													1	4	3	4	2
3	2015-10-13	1	6	1	4	3																									1	9	3	4	2
3	2015-10-13	0																													0
3	2015-10-14	1	6	1	4	2																									0
3	2015-10-14	1	21	3	4	3																									0
3	2015-10-14	0																													1	9	3	4	2
3	2015-10-14	0																													0
3	2015-10-14	1	9	3	4	2																									0
3	2015-10-14	0																													0
3	2015-10-14	0																													0
3	2015-10-14	1	14	3	4	3																									0
3	2015-10-14	1	14	3	4	2																									1	14	3	4	2
3	2015-10-14	1	14	3	3	3																									1	9	3	3	2
3	2015-10-14	1	9	2	3	2																									0
3	2015-10-14	1	9	3	3	2																									1	9	3	3	2	17	3	2	2
3	2015-10-14	0																													0
3	2015-10-14	0																													1	14	3	4	2
3	2015-10-14	1	14	3	4	2																									0
3	2015-10-14	0																													0
3	2015-10-14	0																													0
3	2015-10-14	0																													0
3	2015-10-14	0																													0
3	2015-10-15	0																													0
3	2015-10-15	0																													1	9	3	3	2
3	2015-10-15	1	9	3	4	2	14	3	3	2																					1	9	3	4	2	14	3	2	2
3	2015-10-15	0																													0
3	2015-10-15	1	8	1	1	2																									0
3	2015-10-15	0																													1	9	3	4	3
3	2015-10-15	0																													1	20	3	4	2	9	3	4	2	18	3	4	2
3	2015-10-15	0																													0
3	2015-10-15	0																													1	9	3	5	2
3	2015-10-15	0																													0
3	2015-10-15	1	6	1	4	3																									1	9	1	4	2
3	2015-10-15	1	6	2	4	2	9	3	4	2																					1	9	3	4	2
3	2015-10-15	0																													0
3	2015-10-15	1	6	2	4	2																									0
3	2015-10-15	0																													1	14	3	3	2
3	2015-10-16	0																													1	9	3	4	3
3	2015-10-16	1	14	3	2	3																									0
3	2015-10-16	0																													0
3	2015-10-16	1	22	3	1	1																									0
3	2015-10-16	0																													1	9	1	4	2
3	2015-10-16	0																													0
3	2015-10-16	0																													0
3	2015-10-16	1	9	1	4	2																									1	9	1	4	2
3	2015-10-16	1	22	3	4	2																									1	22	3	4	2
3	2015-10-16	1	14	3	2	3																									0
3	2015-10-16	1	6	2	3	3																									0
3	2015-10-16	0																													1	41	2	4	2
3	2015-10-16	0																													0
3	2015-10-16	0																													0
3	2015-10-19	1	14	3	4	2	21	3	1	1																					0
3	2015-10-19	1	6	2	4	2																									0
3	2015-10-19	1	9	2	4	2	6	2	4	2	14	2	2	2																	0
3	2015-10-19	1	9	1	5	2																									0
3	2015-10-19	0																													0
3	2015-10-19	1	9	3	2	3	12	2	4	2																					0
3	2015-10-19	0																													0
3	2015-10-19	0																													0
3	2015-10-19	0																													1	14	3	4	3
3	2015-10-19	0																													1	9	2	4	3
3	2015-10-19	0																													0
3	2015-10-19	0																													0
3	2015-10-19	1	9	3	4	2																									1	9	3	4	2
3	2015-10-19	0																													1	14	3	2
3	2015-10-19	1	14	3	3	2																									1	24	3	4	2
3	2015-10-19	0																													1	22	1	4	2
3	2015-10-19	0																													0
3	2015-10-19	0																													1	9	3	4	2
3	2015-10-19	1	14	3	2	2																									1	14	3	2	2	22	3	3	3
3	2015-10-19	1	24	1	4	2	21	1	4	2	4	2	4	2	9	1	4	2													0
3	2015-10-19	0																													1	9	1	4	2
3	2015-10-20	1	31	3	4	2																									0
3	2015-10-20	0																													0
3	2015-10-20	0																													0
3	2015-10-20	0																													0
3	2015-11-06	0																													1	9	2	4	2
3	2015-11-12	1	14	3	3	3																									0
3	2015-11-12	1	6	3	3	3																									0
3	2015-11-12	0																													0
3	2015-11-12	0																													0
3	2015-11-12	0																													0
3	2015-11-12	0																													0
3	2015-11-12	0																													0
3	2015-11-12	0																													0
3	2015-11-12	1	6	1	4	3																									0
3	2015-11-12	0																													1	22	3	4	3
3	2015-11-12	0																													1	9	3	4	3
3	2015-11-13	0																													1	14	2	4	3
3	2015-11-13	1	14	3	4	3																									1	9	1	4	2
3	2015-11-13	0																													0
3	2015-11-13	0																													1	6	2	4	3
3	2015-11-13	1	4	1	6	3																									0
3	2015-11-13	0																													1	4	1	4	3
3	2015-11-13	1	2	1	4	3																									0
3	2015-11-13	0																													0
3	2015-11-13	0																													0
3	2015-11-13	0																													0
3	2015-11-13	0																													0
3	2015-11-19	1	6	2	4	3	9	3	4	3																					0
3	2015-11-19	1	14	3	4	3	6	3	4	3																					0
3	2015-11-19	0																													0
3	2015-11-19	1	6	1	4	3																									0
3	2015-11-19	0																													0
3	2015-11-19	0																													0
3	2015-11-20	1	22	2	4	3																									0
3	2015-11-20	0																													1	9	2	4	3
3	2015-11-20	0																													0
3	2015-11-20	0																													0
3	2015-11-20	0																													0
3	2015-11-20	1	41	3	3	3																									0
3	2015-11-20	1	14	2	3	3																									0
3	2015-11-23	1	9	3	4	2	6	3	4	2																					0
3	2015-11-23	0																													0
3	2015-11-23	0																													0
3	2015-11-23	0																													0
3	2015-11-23	0																													0
3	2015-11-23	0																													0
3	2015-11-23	0																													0
3	2015-11-23	1	6	3	4	3																									1	14	3	3	3
3	2015-11-23	0																													0
3	2015-11-25	0																													0
3	2015-11-25	1	6	3	2	3																									1	6	3	2	3
3	2015-11-25	1	6	3	1	1																									1	9	3	1	1
3	2015-11-25	1	6	3	3	3																									1	9	3	2	3
3	2015-11-25	0																													1	9	2	1	1
3	2015-11-25	0																													1	9	2	3	3
3	2015-11-25	1	14	3	2	3																									1	14	3	4	3
3	2015-11-25	0																													0
3	2015-11-25	0																													1	9	3	1	1
3	2015-11-25	0																													0
3	2015-11-25	1	8	2	4	3																									1	4	3	4	3
3	2015-11-25	0																													0
3	2015-11-25	0																													0
3	2015-11-25	1	6	3	2	3																									1	6	3	2	3
3	2015-11-25	0																													0
3	2015-11-26	0																													1	6	3	1	1	14	3	1	1	22	3	4	3	9	3	4	3	25	3
3	2015-11-26	0																													0
3	2015-11-26	0																													1	9	3	4	3
3	2015-11-26	1	6	1	2	3																									0
3	2015-11-26	0																													0
3	2015-11-26	0																													0
3	2015-11-26	1	6	2	3	2																									1	14	3	3	2	9	3	3	2
3	2015-11-26	1	6	2	4	2	20	2	4	3																					0
3	2015-11-26	0																													0
3	2015-11-26	0																													0
3	2015-11-27	1	12	2	3	3																									1	9	3	4	3
3	2015-11-27	0																													0
3	2015-11-30	0																													1	11	2	1	1
3	2015-11-30	0																													1	14	2	2	3
3	2015-11-30	0																													0
3	2015-11-30	0																													1	6	3	4	3
3	2015-12-01	1	6	3	4	3																									1	6	3	4	3
3	2015-12-01	0																													1	6	2	2	3
3	2015-12-01	1	6	3	1	1	14	3	1	1																					1	6	3	1	1	14	3	1	1
3	2015-12-01	1	4	2	4	3																									0
3	2015-12-01	0																													0
3	2015-12-01	0																													0
3	2015-12-01	0																													0
3	2015-12-01	1	6	3	3	2																									1	6	3	3	2
3	2015-12-02	0																													0
3	2015-12-02	1	6	2	4	3																									1	9	3	4	3
3	2015-12-04	1	6	2	4	3																									0
3	2015-12-04	0																													0
3	2015-12-04	0																													0
3	2015-12-04	1	14	3	3	3	6	3	4	3																					1	9	3	2	3
3	2015-12-04	0																													0
3	2015-12-04	0																													0
3	2015-12-07	0																													1	22	3	4	2
3	2015-12-07	0																													0
3	2015-12-07	0																													0
3	2015-12-07	0																													0
3	2015-12-08	0																													0
3	2015-12-08	1																													1
3	2015-12-08	0																													0
3	2015-12-08	0																													0
3	2015-12-09	0																													0
3	2015-12-09	0																													0
3	2015-12-10	0																													0
3	2015-12-10	0																													0
3	2015-12-10	0																													0
3	2015-12-10	0																													0
3	.	1	9	3	4	2	6	3	4	2	14	3	4	2																	1	20	3	4	2	9	3	4	2	14	3	4	2
3	.	1	14	3	4	2	9	3	1	1																					1	9	3	1	1	14	3	4	2
4	2015-10-03	0																													0
4	2015-10-04	0																													0
4	2015-10-20	0																													0
4	2015-10-20	0																													1	9	3	3	2
4	2015-10-20	0																													1	14	3	4	2
4	2015-10-20	0																													0
4	2015-10-20	0																													0
4	2015-10-20	1	3	3	3	3																									0	22	3	2	3
4	2015-10-20	0																													0
4	2015-10-20	0																													1	22	3	3	2	17	3	2	3	2	3	3	3
4	2015-10-21	0																													0
4	2015-10-21	0																													0
4	2015-10-21	0																													0
4	2015-10-21	0																													0
4	2015-10-21	0																													0
4	2015-10-21	0																													1	28	3	2	2
4	2015-10-21	0																													0
4	2015-10-21	0																													1	6	1	5	2
4	2015-10-22	0																													0
4	2015-10-22	0																													1	6	2	4	2
4	2015-10-22	0																													1	14	3	2	2
4	2015-10-22	0																													0
4	2015-10-22	0																													0
4	2015-10-22	0																													0
4	2015-10-22	0																													0
4	2015-10-22	0																													0
4	2015-10-22	0																													1	9	3	4	2	6	2	4	2
4	2015-10-22	0																													0
4	2015-10-22	1	14	1	3	2																									1	14	3	2	3
4	2015-10-22	0																													0
4	2015-10-22	0																													0
4	2015-10-22	0																													0
4	2015-10-22	0																													1	9	3	4	2
4	2015-10-22	0																													1	9	1	4	3
4	2015-10-22	0																													0
4	2015-10-22	0																													1	9	3	3	3
4	2015-10-22	0																													0
4	2015-10-22	0																													0
4	2015-10-23	0																													0
4	2015-10-23	0																													0
4	2015-10-23	0																													0
4	2015-10-23	0																													1	14	3	2	2	22	3	4	2
4	2015-10-23	1	6	2	3	2	18	2	3	2																					1	4	1	4	2
4	2015-10-23	0																													0
4	2015-10-23	0																													0
4	2015-10-23	0																													1	9	3	4	2	11	3	2	1	8	3	2	2
4	2015-10-26	0																													1	9	1	4	2
4	2015-10-26	0																													0
4	2015-10-26	1	6	3	3	2																									1	14	3	2	2	9	3	3	2
4	2015-10-26	0																													1	6	3	4	3
4	2015-10-26	1	7	1	4	2																									1	9	1	4	2
4	2015-10-26	0																													0
4	2015-10-26	0																													0
4	2015-10-26	0																													1	9	1	4	2
4	2015-10-26	0																													0
4	2015-10-26	1	24	1	4	2																									1	14	3	4	2
4	2015-10-26	0																													0
4	2015-10-26	0																													0
4	2015-10-26	0																													0
4	2015-10-26	0																													1	9	3	2	2	14	3	2	2
4	2015-10-26	0																													0
4	2015-10-26	0																													0
4	2015-10-26	0																													0
4	2015-10-27	0																													0
4	2015-10-27	0																													0
4	2015-10-27	0																													0
4	2015-10-27	0																													0
4	2015-10-27	0																													0
4	2015-10-27	0																													0
4	2015-10-27	1	17	2	4	3	2	2	4	3	28	2	4	2																	0
4	2015-10-27	0																													0
4	2015-10-27	1	6	2	4	2																									0
4	2015-10-27	0																													0
4	2015-10-27	0																													1	9	3	1	1	3	3	1	1
4	2015-10-27	0																													1	25	3	2	2	9	3	3	2
4	2015-10-27	0																													0
4	2015-10-27	0																													0
4	2015-10-27	0																													0
4	2015-10-28	0																													0
4	2015-10-28	0																													1	9	3	3	2
4	2015-10-28	0																													0
4	2015-10-28	0																													0
4	2015-10-28	0																													0
4	2015-10-28	0																													1	9	3	2	3
4	2015-10-28	0																													0
4	2015-10-28	0																													1	14	3	2	3
4	2015-10-28	0																													0
4	2015-10-28	0																													1	7		2	2	14	3	2	2	9	1	3	2
4	2015-10-28	0																													1	17	3	2	3
4	2015-10-28	0																													1	17	2	2	3
4	2015-10-28	0																													0
4	2015-10-28	0																													0
4	2015-10-28	0																													1	17	3	1	1
4	2015-10-28	0																													0
4	2015-10-28	0																													1	9	3	4	2	17	3	4	2
4	2015-10-28	0																													1	21	3	2	3
4	2015-10-28	0																													0
4	2015-10-29	0																													0
4	2015-10-29	0																													0
4	2015-10-29	0																													0
4	2015-10-29	1	4	2	4	2	22	2	4	2																					0
4	2015-10-29	0																													1	2	1	4	2
4	2015-10-29	0																													1	14	3	4	2
4	2015-10-29	0																													0
4	2015-10-29	0																													0
4	2015-10-29	1	14	3	4	2	3	2	4	2	8	1	4	2	2	2	4	2													1	14	3	4	2	3	2	4	2	8	1	4	2	2	2	4	2
4	2015-10-29	0																													1	14	3	2	3
4	2015-10-29	1	6	2	2	2																									0
4	2015-10-29	0																													0
4	2015-10-29	1	2	2	3	2	3	1	3	2																					0
4	2015-10-29	0																													0
4	2015-10-29	0																													0
4	2015-10-29	0																													0
4	2015-10-29	0																													0
4	2015-10-29	0																													0
4	2015-10-29	0																													0
4	2015-10-29	0																													0
4	2015-10-29	0																													0
4	2015-10-30	0																													0
4	2015-10-30	0																													0
4	2015-10-30	0																													0
4	2015-10-30	0																													0
4	2015-10-30	0																													0
4	2015-10-30	0																													0
4	2015-10-30	0																													0
4	2015-10-30	0																													0
4	2015-10-30	0																													0
4	2015-10-30	0																													1	17	2	3	2
4	2015-10-30	0																													1	9	1	2	2	14	3	3	2
4	2015-10-30	0																													0
4	2015-10-30	1	14	3	1	1	25	3	1	1	22	3	1	1																	1	14	3	1	1	22	3	1	1	25	3	1	1
4	2015-10-30	1	6	1	3	2																									1	6	3	4	3
4	2015-10-30	0																													0
4	2015-10-30	0																													1	17	3	1	1
4	2015-10-30	0																													0
4	2015-10-30	1	21	2	4	3																									0
4	2015-10-30	0																													0
4	2015-10-30	0																													0
4	2015-10-30	1	6	1	4	3																									0
4	2015-11-02	0																													1	15	1	2	2
4	2015-11-02	0																													0
4	2015-11-02	0																													0
4	2015-11-02	0																													0
4	2015-11-02	1	23	3	4	2																									1	14	1	2	3
4	2015-11-02	0																													0
4	2015-11-02	0																													0
4	2015-11-02	0																													0
4	2015-11-02	0																													0
4	2015-11-02	0																													0
4	2015-11-02	0																													0
4	2015-11-02	0																													0
4	2015-11-02	0																													0
4	2015-11-02	0																													0
4	2015-11-02	1	20	2	1	1	21	2	1	1																					1	22	2	1	1	6	2	1	1
4	2015-11-02	0																													0
4	2015-11-02	0																													0
4	2015-11-02	1	25	1	4	2	26	1	4	2	22	1	4	2																	0
4	2015-11-02	0																													0
4	2015-11-02	0																													1	14	3	2	3
4	2015-11-02	0																													0
4	2015-11-02	0																													0
4	2015-11-02	0																													0
4	2015-11-02	0																													0
4	2015-11-02	0																													0
4	2015-11-03	0																													0
4	2015-11-03	0																													0
4	2015-11-03	0																													1	14	1	2	3
4	2015-11-03	0																													0
4	2015-11-03	0																													0
4	2015-11-03	0																													0
4	2015-11-03	0																													0
4	2015-11-03	0																													0
4	2015-11-03	0																													1	14	3	4	3	20	3	4	3
4	2015-11-03	0																													1	17	3	1	1	14	3	1	1
4	2015-11-03	0																													0
4	2015-11-03	0																													0
4	2015-11-03	0																													1	14	3	1	1
4	2015-11-03	0																													0
4	2015-11-03	0																													0
4	2015-11-03	0																													0
4	2015-11-03	0																													0
4	2015-11-03	1	2	1	4	2	17	3	4	2																					0
4	2015-11-04	0																														14	3	2	3
4	2015-11-04	0																													0
4	2015-11-04	0																													0
4	2015-11-04	0																													1	14	3	2	3	9	3	4	3
4	2015-11-04	0																													0
4	2015-11-04	0																													0
4	2015-11-04	0																													0
4	2015-11-04	0																													0
4	2015-11-04	0																													1	14	3	1	1
4	2015-11-04	0																													0
4	2015-11-04	0																													0
4	2015-11-04	0																													1	9	3	1	1
4	2015-11-04	0																													0
4	2015-11-04	0																													0
4	2015-11-04	0																													1	41	1	4	3
4	2015-11-04	0																													0
4	2015-11-04	0																													0
4	2015-11-04	0																													0
4	2015-11-05	0																													0
4	2015-11-05	0																													0
4	2015-11-05	0																													0
4	2015-11-05	0																													1	14	3	3	2
4	2015-11-05	0																													1	14	3	4	2
4	2015-11-05	0																													1	4	2	6	3
4	2015-11-05	0																													0
4	2015-11-05	0																													0
4	2015-11-05	0																													0
4	2015-11-05	0																													0
4	2015-11-06	0																													1	20	3	3	3	22	3	3	3
4	2015-11-06	1	6	3	2	2																									1	6	3	2	2
4	2015-11-06	0																													0
4	2015-11-06	0																													0
4	2015-11-06	0																													0
4	2015-11-06	0																													0
4	2015-11-06	1	17	1	4	2	13	2	4	2	6	2	4	2																	0
4	2015-11-06	0																													0
4	2015-11-06	0																													0
4	2015-11-06	0																													0
4	2015-11-06	0																													0	22	3	3	2	14	3	2	2
4	2015-11-09	0																													0
4	2015-11-09	0																													0
4	2015-11-09	0																													0
4	2015-11-09	0																													0
4	2015-11-09	0																													0
4	2015-11-09	0																													0
4	2015-11-09	0																													0
4	2015-11-09	1	14	3	4	2																									1	14	3	4	3
4	2015-11-09	0																													0
4	2015-11-09	1	6	3	2	3																									1	4	2	2	3
4	2015-11-09	0																													1	14	3	2	3
4	2015-11-09	0																													0
4	2015-11-09	0																													0
4	2015-11-09	0																													0
4	2015-11-10	0																													0
4	2015-11-10	0																													0
4	2015-11-10	1	6	2	3	3																									0
4	2015-11-10	0																													0
4	2015-11-10	0																													0
4	2015-11-10	0																													0
4	2015-11-10	0																													1	14		1	1
4	2015-11-10	0																													0
4	2015-11-10	0																													1	9	3	3	2	14	3	2	2
4	2015-11-10	0																													1	14	3	2	2
4	2015-11-10	0																													1	9	3	3	3	14	3	2	3
4	2015-11-10	0																													0
4	2015-11-10	0																													0
4	2015-11-10	0																													0
4	2015-11-10	0																													0
4	2015-11-10	0																													0
4	2015-11-11	0																													0
4	2015-11-11	0																													0
4	2015-11-11	1	14	3	3	3																									0
4	2015-11-11	0																													0
4	2015-11-11	0																													0
4	2015-11-11	0																													0
4	2015-11-11	0																													0
4	2015-11-11	1	41	1	4	3																									1	31	2	4	3
4	2015-11-11	0																													0
4	2015-11-24	0																													0
4	2015-11-24	0																													0
4	2015-11-24	1	6	2	4	3																									0
4	2015-11-24	0																													1	17	3	4	3
4	2015-11-24	1	14	2	3	3																									0
4	2015-11-24	0																													0
4	2015-11-24	1	14	2	2	3																									0
4	2015-11-24	0																													0
4	2015-11-25	0																													0
4	2015-11-25	0																													0
4	2015-11-25	0																													0
4	2015-11-25	0																													0
4	2015-11-25	0																													0
4	2015-11-25	0																													0
4	2015-11-25	0																													0
4	2015-11-25	0																													0
4	2015-11-25	0																													0
4	2015-11-25	0																													0
4	2015-11-25	0																													0
4	2015-11-25	1	6	1	3	3																									0
4	2015-11-25	0																													1	21	3	3	3
4	2015-11-25	1	14	3	3	3																									0
4	2015-11-25	0																													0
4	2015-11-25	0																													0
4	2015-11-25	0																													0
4	2015-11-25	0																													0
4	2015-11-25	0																													0
4	2015-11-25	0																													0
4	2015-11-25	0																													0
4	2015-11-25	0																													0
4	2015-11-25	0																													0
4	2015-11-25	0																													0
4	2015-11-25	0																													1	9	2	4	2
4	2015-11-25	0																													0
4	2015-11-25	0																													0
4	2015-11-25	0																													0
4	2015-11-25	0																													0
4	2015-11-25	0																													0
4	2015-11-25	0																													0
4	2015-11-25	0																													0
4	2015-11-25	0																													0
4	2015-11-25	1	6	3	3	3																									0
4	2015-11-25	0																													0
4	2015-11-26	0																													0
4	2015-11-26	0																													0
4	2015-11-26	0																													0
4	2015-11-26	0																													0
4	2015-11-26	0																													1	14	2	4	3
4	2015-11-26	0																													0
4	2015-11-26	1	6	3	3	3	39	3	2	3																					0
4	2015-11-26	0																													0
4	2015-11-26	0																													0
4	2015-11-26	0																													1	14	2	2	2
4	2015-11-26	0																													1	6	2	2	2	9	2	3	2
4	2015-11-26	0																													0
4	2015-11-26	0																													1	2	2	4	3
4	2015-11-26	0																													0
4	2015-11-26	0																													0
4	2015-11-26	0																													0
4	2015-11-27	0																													0
4	2015-11-27	0																													0
4	2015-11-27	0																													0
4	2015-11-27	0																													0
4	2015-11-27	0																													1	8	2	4	3
4	2015-11-27	0																													0
4	2015-11-30	0																													0
4	2015-11-30	0																													0
4	2015-11-30	0																													0
4	2015-11-30	0																													0
4	2015-11-30	0																													0
4	2015-12-01	0																													0
4	2015-12-01	0																													0
4	2015-12-01	0																													0
4	2015-12-01	0																													0
4	2015-12-01	0																													0
4	2015-12-01	0																													0
4	2015-12-01	0																													0
4	2015-12-01	0																													0
4	2015-12-01	0																													0
4	2015-12-01	0																													1	25	2	3	3
4	2015-12-01	1	14	3	2	3																									0
4	2015-12-01	0																													0
4	2015-12-02	0																													0
4	2015-12-02	0																													0
4	2015-12-02	1	6	2	3	3																									0
4	2015-12-02	0																													0
4	2015-12-02	0																													0
4	2015-12-02	0																													0
4	2015-12-02	0																													0
4	2015-12-02	0																													0
4	2015-12-02	0																													1	6	2	4	3
4	2015-12-02	0																													0
4	2015-12-02	0																													0
4	2015-12-02	0																													0
4	2015-12-02	0																													0
4	2015-12-02	0																													0
4	2015-12-02	0																													0
4	2015-12-02	0																													0	14	3	2	3
4	2015-12-02	0																													0
4	2015-12-02	0																													0
4	2015-12-02	0																													0
4	2015-12-02	0																													0
4	2015-12-02	0																													0
4	2015-12-02	1	6	2	3	3																									0
4	2015-12-02	0																													0
4	2015-12-03	0																													0
4	2015-12-03	0																													0
4	2015-12-03	0																													0
4	2015-12-03	0																													0
4	2015-12-03	0																													0
4	2015-12-03	0																													0
4	2015-12-03	1	14	3	1	1																									0
4	2015-12-03	0																													0
4	2015-12-03	0	25	2	4	3																									0
4	2015-12-03	0																													0
4	2015-12-03	0																													0
4	2015-12-03	0																													0
4	2015-12-03	0																													0
4	2015-12-03	0																													0	17	2	3	3
4	2015-12-03	0																													0
4	2015-12-03	0																													0
4	2015-12-03	0																													0
4	2015-12-03	0																													0
4	2015-12-04	0																													0
4	2015-12-04	1	14	1	4	3																									0
4	2015-12-04	0																													0
4	2015-12-04	0																													0
4	2015-12-04	0																													0
4	2015-12-04	0																													0
4	2015-12-04	0																													0
4	2015-12-04	0																													0
4	2015-12-04	0																													0
4	2015-12-04	0																													0
4	2015-12-04	0																													0
4	2015-12-04	0																													0
4	2015-12-04	0																													0
4	2015-12-04	1																													0
4	2015-12-07	0																													0
4	2015-12-07	1	6	1	3	3																									0
4	2015-12-07	0																													1	14	1	3	3
4	2015-12-07	0																													1	14	1	4	3
4	2015-12-07	1																													0
4	2015-12-08	0																													0
4	2015-12-08	0																													0
4	2015-12-08	0																													0
4	2015-12-09	0																													0
4	2015-12-14	0																													0
4	2015-12-14	0																													0
4	2015-12-14	0																													0
4	2015-12-14	1																													0
4	2015-12-14	0																													0
4	2015-12-14	0																													0
4	2015-12-17	0																													0
4	2015-12-17	0																													0
4	2015-12-17	0																													0
4	2015-12-17	0																													0
4	2015-12-17	0																													0
5	2015-10-22	0																													0
5	2015-10-22	0																													0
5	2015-10-22	0																													0
5	2015-10-22	0																													0
5	2015-10-22	0																													0
5	2015-10-22	0																													0
5	2015-10-22	0																													0
5	2015-10-22	0																													0
5	2015-10-22	0																													0
5	2015-10-22	0																													1	28	3	2	3
5	2015-10-22	0																													0
5	2015-10-22	0																													0
5	2015-10-22	0																													0
5	2015-10-22	1	25	2	1	1	17	1	1	1																					0
5	2015-10-23	0																													0
5	2015-10-23	0																													0
5	2015-10-23	1	25	1	4	3																									0
5	2015-10-23	0																													0
5	2015-10-23	0																													0
5	2015-10-23	0																													0
5	2015-10-23	0																													0
5	2015-10-23	0																													0
5	2015-10-23	0																													0
5	2015-10-23	0																													0
5	2015-10-23	0																													0
5	2015-10-23	1	5	2	4	3																									1	17	3	4	3
5	2015-10-23	0																													0
5	2015-10-23	0																													0
5	2015-10-23	1	24	3	4	3																									0
5	2015-10-23	0																													0
5	2015-10-23	0																													0
5	2015-10-23	0																													0
5	2015-10-26	0																													0
5	2015-10-26	0																													0
5	2015-10-26	1	6	1	1	1																									0
5	2015-10-26	0																													0
5	2015-10-26	1	5	3	1	1																									0
5	2015-10-26	1	14	2	1	1																									0
5	2015-10-26	1	14	2	4	3																									1	29	3	4	3
5	2015-10-26	1	14	1	1	1																									0
5	2015-10-26	0																													0
5	2015-10-26	0																													0
5	2015-10-26	0																													0
5	2015-10-26	0																													0
5	2015-10-26	0																													0
5	2015-10-26	0																													0
5	2015-10-26	0																													0
5	2015-10-26	0																													1	20	2	1	1
5	2015-10-26	1	6	2	3	3																									0
5	2015-10-26	0																													0
5	2015-10-26	0																													0
5	2015-10-26	0																													0
5	2015-10-26	1	13	1	1	1																									1	14	3	4	3
5	2015-10-26	1	29	1	4	3																									0
5	2015-10-26	0																													0
5	2015-10-26	0																													0
5	2015-10-26	1	6	1	4	3																									0
5	2015-10-26	0																													0
5	2015-10-26	0																													0
5	2015-10-27	0																													0
5	2015-10-27	0																													0
5	2015-10-27	0																													0
5	2015-10-27	0																													0
5	2015-10-27	0																													0
5	2015-10-27	0																													0
5	2015-10-27	1	6	1	3	3																									0
5	2015-10-27	0																													0
5	2015-10-27	1	6	2	2	3	8	3	2	3																					0
5	2015-10-27	0																													0
5	2015-10-27	0																													0
5	2015-10-27	0																													0
5	2015-10-27	0																													0
5	2015-10-27	1	6	1	4	3																									0
5	2015-10-27	0																													0
5	2015-10-27	0																													0
5	2015-10-27	0																													0
5	2015-10-27	0																													0
5	2015-10-27	0																													0
5	2015-10-27	0																													0
5	2015-10-27	0																													0
5	2015-10-27	0																													0
5	2015-10-28	0																													0
5	2015-10-28	1	29	2	1	1																									0
5	2015-10-28	0																													0
5	2015-10-28	1	14	2	1	1																									0
5	2015-10-28	0																													0
5	2015-10-28	1	23	2	1	1																									0
5	2015-10-28	0																													0
5	2015-10-28	0																													0
5	2015-10-28	0																													0
5	2015-10-28	0																													0
5	2015-10-28	1	2	1	4	3																									0
5	2015-10-28	0																													0
5	2015-10-28	0																													0
5	2015-10-28	0																													1	9	3	4	3
5	2015-10-28	0																													0
5	2015-10-28	0																													0
5	2015-10-28	0																													0
5	2015-10-28	0																													0
5	2015-10-28	0																													0
5	2015-10-28	0																													0
5	2015-10-28	0																													0
5	2015-10-28	0																													0
5	2015-10-28	0																													0
5	2015-10-28	0																													0
5	2015-10-28	0																													0
5	2015-10-28	1	14	2	1	1																									0
5	2015-10-29	1	13	1	4	2																									0
5	2015-10-29	1	11	1	4	3																									0
5	2015-10-29	1	28	1	4	3																									0
5	2015-10-29	0																													0
5	2015-10-29	0																													0
5	2015-10-29	1	9	2	1	1																									0
5	2015-10-29	0																													0
5	2015-10-29	0																													1	29		4	3
5	2015-10-29	1	6	1	4	3																									0
5	2015-10-29	0																													1	9	3	1	1
5	2015-10-29	0																													0
5	2015-10-29	0																													0
5	2015-10-29	0																													0
5	2015-10-29	0																													0
5	2015-10-29	0																													1	25	3	4	3
5	2015-10-29	0																													0
5	2015-10-29	0																													0
5	2015-10-29	0																													0
5	2015-10-29	0																													0
5	2015-10-29	0																													1	26	3	4	3
5	2015-10-29	0																													0
5	2015-10-29	0																													0
5	2015-10-29	0																													0
5	2015-10-29	0																													0
5	2015-10-29	0																													0
5	2015-10-30	1	3	2	4	3																									0
5	2015-10-30	0																													0
5	2015-10-30	0																													0
5	2015-10-30	0																													0
5	2015-10-30	0																													0
5	2015-10-30	0																													0
5	2015-10-30	1	17	2	1	1																									0
5	2015-10-30	0																													0
5	2015-10-30	0																													0
5	2015-10-30	0																													0
5	2015-10-30	0																													1	6	2	4	3
5	2015-10-30	0																													0
5	2015-10-30	0																													0
5	2015-10-30	0																													0
5	2015-10-30	1	20	3	1	3																									0
5	2015-10-30	0																													1	17	3	4	3
5	2015-10-30	1	5	3	1	1	2	3	3	3	6	2	3	3																	0
5	2015-10-30	0																													0
5	2015-10-30	0																													0
5	2015-10-30	0																													0
5	2015-10-30	0																													0
5	2015-10-30	0																													0
5	2015-10-30	0																													0
5	2015-10-30	0																													0
5	2015-10-30	0																													0
5	2015-10-30	1	6	1	4	3																									0
5	2015-10-30	0																													0
5	2015-10-30	0																													0
5	2015-10-30	0																													0
5	2015-10-30	0																													1	14	3	4	3
5	2015-10-30	0																													0
5	2015-11-02	0																													0
5	2015-11-02	0																													0
5	2015-11-02	0																													0
5	2015-11-02	0																													1	9	3	4	3
5	2015-11-02	0																													0
5	2015-11-02	0																													0
5	2015-11-02	0																													0
5	2015-11-02	0																													0
5	2015-11-02	0																													0
5	2015-11-02	0																													0
5	2015-11-02	1	13	3	1	1																									0
5	2015-11-02	1	6	1	3	3																									0
5	2015-11-02	0																													0
5	2015-11-02	0																													0
5	2015-11-02	0																													0
5	2015-11-02	0																													0
5	2015-11-02	0																													0
5	2015-11-02	0																													0
5	2015-11-02	0																													0
5	2015-11-02	1	1	3	1	1																									0
5	2015-11-02	0																													0
5	2015-11-02	1	9	1	4	3																									0
5	2015-11-02	0																													0
5	2015-11-03	0																													0
5	2015-11-03	0																													0
5	2015-11-03	0																													0
5	2015-11-03	0																													0
5	2015-11-03	0																													0
5	2015-11-03	1	3	1	1	1																									0
5	2015-11-03	0																													1	17	3	2	3
5	2015-11-03	0																													1	9	3	3	3	26	3	3	3
5	2015-11-03	0																													0
5	2015-11-03	0																													0
5	2015-11-03	0																													0
5	2015-11-03	0																													0
5	2015-11-03	0																													0
5	2015-11-03	0																													0
5	2015-11-03	0																													1	17	3	1	1
5	2015-11-03	0																													0
5	2015-11-03	0																													0
5	2015-11-03	0																													0
5	2015-11-03	0																													0
5	2015-11-10	0																													0
5	2015-11-10	0																													0
5	2015-11-10	0																													1	2	2	4	3
5	2015-11-10	0																													0
5	2015-11-10	0																													0
5	2015-11-10	0																													0
5	2015-11-10	0																													0
5	2015-11-10	0																													0
5	2015-11-10	0																													0
5	2015-11-10	0																													0
5	2015-11-10	0																													0
5	2015-11-10	0																													0
5	2015-11-10	0																													0
5	2015-11-18	0																													1	9	1	4	2
5	2015-11-18	0																													0
5	2015-11-18	0																													0
5	2015-11-18	0																													0
5	2015-11-18	0																													0
5	2015-11-19	1	2	1	4	3	14	1	2	3																					0
5	2015-11-19	0																													0
5	2015-11-19	0																													1	14	3	1	1
5	2015-11-19	1	6	2	4	3																									1	14		1	1	8		1	1
5	2015-11-19	0																													1	9	3	4	2
5	2015-11-19	0																													1	14	1	4	2
5	2015-11-19	0																													0
5	2015-11-19	0																													0
5	2015-11-19	0																													1	14	2	4	3
5	2015-11-23	0																													1	17	1	4	3
5	2015-11-23	0																													0
5	2015-11-23	0																													0
5	2015-11-23	0																													0
5	2015-11-23	0																													1	8	3	2	3
5	2015-11-23	0																													0
5	2015-11-23	0																													1	4	3	4	2
5	2015-11-26	1	32	2	4	3																									1	32
5	2015-11-26	0																													0
5	2015-11-26	0																													0
5	2015-11-26	0																													1	6	3	4	3
5	2015-11-26	0																													0
5	2015-11-26	0																													0
5	2015-11-26	0																													0
5	2015-11-26	0																													0
5	2015-11-26	0																													0
6	2015-10-30	1	21	3	1	1																									1	9	3	1	1	21	3	1	1
6	2015-10-30	0																													1	14	3	4	3
6	2015-10-30	1	6	3	3	2	9	3	2	3																					1	6	3	3	2	9	3	2	3
6	2015-10-30	1	9	3	2	3	3	3	4	3	8	3	4	3	11	3	4	3	21	3	1	1									1	9	3	1	1	21	3	2	3	3	3	4	3	11	3	4	3	8	3
6	2015-10-30	1	9	3	1	1	22	3	1	1																					1	9	3	1	1
6	2015-10-30	1	9	3	3	3	21	3	4	3																					0
6	2015-10-30	0																													0
6	2015-10-30	1	21	2	1	1	6	2	1	1																					1	9	3	1	1
6	2015-10-30	0																													0
6	2015-10-30	1	9	3	3	2	14	3	3	2																					0
6	2015-10-30	0																													0
6	2015-10-30	1	18	3	2	3	6	3	3	2																					1	9	3	2	3
6	2015-11-02	1	9	2	1	1	1	2	1	1																					0
6	2015-11-02	0																													0
6	2015-11-02	1	21	3	3	2	20	2	3	2																					1	21	3	3	2
6	2015-11-02	0																													1	9	3	4	3	6	3	2	3
6	2015-11-02	1	11	3	2	3																									1	9	3	1	1	17	3	2	3	14	3	2	3
6	2015-11-02	1	14	3	3	2																									1	14	3	3	2
6	2015-11-02	1	9	3	2	3																									1	9	3	2	3
6	2015-11-02	1	9	2	1	1																									0
6	2015-11-02	1	6	2	2	3																									0
6	2015-11-02	1	4	1	4	3	20	2	1	1																					0
6	2015-11-02	1	38	3	1	1																									0
6	2015-11-02	0																													1	9	3	1	1
6	2015-11-02	0																													1	9	3	4	3
6	2015-11-02	0																													0
6	2015-11-02	1	14	2	3	2																									0
6	2015-11-02	0																													1	9	3	2	3	8	3	3	2
6	2015-11-02	0																													1	9	3	1	1	25	3	1	1	6	3	1	1
6	2015-11-02	0																													0
6	2015-11-02	0																													1	14	3	1	1	17	3	1	1	8	3	1	1	9	3	1	1
6	2015-11-02	0																													0
6	2015-11-02	1	14	2	2	3	25	2	1	1																					0
6	2015-11-02	0																													1	9	2	1	1
6	2015-11-02	1	9	2	4	1																									0
6	2015-11-02	1	14	2	4	3	6	2	4	3																					1	14	3	4	3	17	3	4	3	13	3	4	3	8	3	4	3
6	2015-11-02	0																													0
6	2015-11-02	1	6	2	3	2	13	2	3	2	22	3	2	3																	1	14	2	2	3	21	3	4	3	9	3	2	3
6	2015-11-02	1	9	3	2	3																									1	21	3	1	1
6	2015-11-02	0																													1	8	3	3	2
6	2015-11-03	0																													1	9	3	2	2
6	2015-11-03	0																													1	9	3	3	2
6	2015-11-03	0																													1	9	3	2	3
6	2015-11-03	0																													0
6	2015-11-03	0																													1	9	3	4	3
6	2015-11-03	0																													0
6	2015-11-03	0																													0
6	2015-11-03	0																													0
6	2015-11-03	0																													1	6	3	2	3
6	2015-11-03	1	21	2	4	3	6	2	2	3																					0
6	2015-11-03	0																													0
6	2015-11-03	0																													1	9	3	4	3
6	2015-11-03	1	6	3	4	3																									0
6	2015-11-03	1	28	3	4	3	9	3	4	3																					0
6	2015-11-03	0																													1	9	3	1	1
6	2015-11-03	0																													1	9	3	3	2
6	2015-11-03	0																													0
6	2015-11-03	0																													0
6	2015-11-03	0																													1	9	3	1	1	14	3	1	1
6	2015-11-03	0																													0
6	2015-11-03	0																													0
6	2015-11-03	0																													1	9	3	1	1	28	3	2	3
6	2015-11-03	0																													1	17	3	2	3
6	2015-11-03	1	17	2	4	3																									0
6	2015-11-03	1	11	3	1	1	8	3	3	2	14	3	2	3																	0	11	3	1	1	14	3		3	8	3	3	2
6	2015-11-03	0																													0
6	2015-11-04	1	9	3	2	3																									1	9	3	2	3
6	2015-11-04	1	14	3	3	2																									0
6	2015-11-04	0																													1	17	3	3	3
6	2015-11-04	0																													1	9	3	2	3
6	2015-11-04	0																													1	9	3	2	3	6	3	3	2
6	2015-11-04	0																													1	9	3	2	3
6	2015-11-04	0																													1	14	3	3	2	9	3	2	3
6	2015-11-04	1	6	2	1	1	14	3	2	3																					1	21	3	4	3	14	3	2	3
6	2015-11-04	0																													0
6	2015-11-04	0																													1	9	3	2	3	8	3	4	3
6	2015-11-04	0																													0
6	2015-11-04	0																													1	9	3	1	1
6	2015-11-04	1	41	2	3	2																									0
6	2015-11-04	0																													1	14	3	4	3
6	2015-11-04	0																													0
6	2015-11-04	0																													1	9	3	3	2	14	3	3	2
6	2015-11-04	1	26	2	4	3	11	2	4	3																					1	9	3	2	3	21	3	4	3
6	2015-11-04	0																													0
6	2015-11-04	1	8	3	2	3																									1	9	3	3	2
6	2015-11-04	0																													1	13	3	4	3
6	2015-11-04	1	11	3	1	1	18	2	4	3	21	2	4	3	8	2	4	3													1	9	3	1	1
6	2015-11-04	0																													1	14	3	2	3
6	2015-11-04	0																													1	28	3	2	3
6	2015-11-04	0																													1	17	3	4	3	28	3	4	3	14	3	2	3
6	2015-11-04	1	6	3	3	2	14	3	3	2																					1	9	3	2	3	6	3	3	2
6	2015-11-04	0																													1	9	3	1	1	8	3	3	2	14	3	2	3
6	2015-11-04	0																													1	14	3	2	3
6	2015-11-04	1	6	3	1	1	18	2	1	1	11	2	1	1																	1	6	3	1	1
6	2015-11-05	0																													1	9	2	2	2
6	2015-11-05	1	21	1	1	3																									0
6	2015-11-05	0																													1	9	3	2	3
6	2015-11-05	0																													1	9	3	4	3
6	2015-11-05	0																													1	9	3	4	3
6	2015-11-05	0																													1	14	3	2	3	9	3	2	3
6	2015-11-05	0																													1	9	3	2	3	14	3	3	2
6	2015-11-05	1	6	3	2	3	8	3	2	3	20	3	2	3	18	3	2	3													0
6	2015-11-05	0																													0
6	2015-11-05	0																													1	6	3	3	3
6	2015-11-05	0																													1	9	3	4	3
6	2015-11-05	0																													0
6	2015-11-05	0																													0
6	2015-11-05	1	14	3	2	3																									1	14	3	2	3
6	2015-11-05	0																													1	9	2	4	3	6	2	2	3
6	2015-11-05	1	6	3	4	3	28	3	4	3																					1	6	3	4	3	28	3	4	3
6	2015-11-05	0																													0
6	2015-11-05	1	9	3	1	3																									1	9	3	1	1	8	3	1	1
6	2015-11-05	1	6	3	2	3																									0
6	2015-11-05	0																													1	9	3	1	1
6	2015-11-05	0																													0
6	2015-11-05	1	17	3	2	3																									1	17	3	2	3
6	2015-11-05	0																													0
6	2015-11-05	0																													0
6	2015-11-05	1	11	2	1	1	23	2	4	3	8	2	4	3																	1	9	3	4	3
6	2015-11-05	0																													1	9	3	3	2
6	2015-11-05	1	22	3	3	2																									1	17	2	2	3	22	3	3	2	9	3	2	2	14	3	3	2
6	2015-11-05	1	11	3	1	1																									1	22	3	2	3
6	2015-11-06	0																													1	6	2	4	3
6	2015-11-06	0																													1	9	3	3	3
6	2015-11-06	0																													1	21	3	1	1
6	2015-11-06	1	28	1	2	3																									1	9	3	1	1
6	2015-11-06	1	21	2	4	3	6	2	4	3																					1	9	3	4	3	14	3	2	3	21	3	4	3
6	2015-11-06	1	9	1	1	1	6	1	1	1																					0
6	2015-11-06	0																													1	9	3	1	1
6	2015-11-06	0																													0
6	2015-11-06	0																													0
6	2015-11-06	1	14	3	4	3																									1	8	3	2	3
6	2015-11-06	1	30	3	3	3																									1	30	3	3	3
6	2015-11-06	1	9	3	1	1	6	3	1	1	14	3	1	1	21	3	1	1													1	9	3	1	1	21	3	1	1	6	3	1	1	14	3	1	1
6	2015-11-06	0																													1	6	2	4	3
6	2015-11-06	0																													1	9	3	1	1
6	2015-11-06	0																													1	9	2	1	1
6	2015-11-06	1	6	2	4	3																									1	9	2	4	3	14	2	4	3
6	2015-11-06	0																													1	9	3	2	3
6	2015-11-06	0																													0
6	2015-11-06	0																													0
6	2015-11-06	1	14	2	4	3																									0
6	2015-11-06	0																													0
6	2015-11-06	0																													1	14	3	1	1	9	3	1	1
6	2015-11-06	0																													0
6	2015-11-06	1	9	3	4	3																									1	9	3	4	3
6	2015-11-06	0																													1	9	3	4	3	14	3	4	3
6	2015-11-06	1	21	2	1	1																									1	14	3	2	3
6	2015-11-06	1	14	3	1	1	6	3	1	1																					1	14	3	1	1	6	3	1	1
6	2015-11-06	0																													0
6	2015-11-06	0																													0
6	2015-11-06	1	27	2	1	1	6	2	1	1																					1	9	3	1	1
6	2015-11-06	1	14	3	3	3																									1	14	2	3	2
6	2015-11-09	0																													0
6	2015-11-09	0																													1	6	3	4	3
6	2015-11-09	0																													1	14	2	4	3	9	2	4	3
6	2015-11-09	1	14	2	3	2																									0
6	2015-11-09	0																													0
6	2015-11-09	1	6	3	1	1																									1	6	3	1	1
6	2015-11-09	1	9	3	4	3	14	2	2	3	6	3	4	3																	1	9	3	4	3	6	3	4
6	2015-11-09	1	17	2	4	3	18	2	4	3																					0
6	2015-11-09	1	4	1	4	3																									0
6	2015-11-09	0																													0
6	2015-11-09	1	6	3	4	3																									1	6	3	4	3	21	3	1	1
6	2015-11-09	1	6	2	2	3																									0
6	2015-11-09	0																													0
6	2015-11-09	0																													0
6	2015-11-09	1	41	2	4	3																									1	8	3	2	3
6	2015-11-09	0																													0
6	2015-11-09	1	38	3	4	3	6	2	4	3	34	3	4	3																	1	41	3	4	3	37	3	4		36	3	4	3
6	2015-11-09	0																													1	9	3	2	3
6	2015-11-09	1	8	1	3	2	11	2	3	2																					0
6	2015-11-09	1	14	3	2	3																									1	14	3	4	3	9	3	3	2
6	2015-11-09	0																													1	14	3	2	3	9	3	2	3
6	2015-11-10	0																													1	9	3	1	1
6	2015-11-11	0																													1	9	3	2	2
6	2015-11-11	1	1	3	2	2	14	3	2	2																					1	14	3	4	2	9	3	1	2
6	2015-11-11	0																													0
6	2015-11-12	0																													0
6	2015-11-12	0																													1	9	3	4	2
6	2015-11-12	0																													1	9	3	1	1
6	2015-11-12	0																													1	25	2	3	2
6	2015-11-12	0																													1	9	3	1	1
6	2015-11-12	1	20	2	1	1																									0
6	2015-11-12	0																													0
6	2015-11-12	0																													1	14		1	1
6	2015-11-12	0																													1	9	3	2	2
6	2015-11-17	0																													1	6	3	3	3	9	3	2	3
6	2015-11-18	0																													1	14	3	4	3
6	2015-11-18	0																													1	9	2	1	1
6	2015-11-18	1	9	3	4	3	22	2	2	3																					1	6	2	3	3
6	2015-11-18	0																													1	9	3	1	1	6	3	1	1
6	2015-11-18	0																													1	6	3	4	3
6	2015-11-18	1	14	3	2	3	13	2	4	3																					1	14	3	2	3
6	2015-11-18	1	6	2	2	3																									0
6	2015-11-18	1	26	3	4	3																									0
6	2015-11-18	1	14	2	1	1	6	2	3	3																					1	9	3	4	3
6	2015-11-19	0																													0
6	2015-11-19	1	14	3	3	3																									1	6	2	1	1
6	2015-11-19	0																													0
6	2015-11-19	0																													0
6	2015-11-19	0																													1	9	2	4	3
6	2015-11-19	1	11	3	1	1																									1	13	2	4	3
6	2015-11-20	1	14	3	3	3	6	3	3	3																					0
6	2015-11-20	1	6	2	3	3																									0
6	2015-11-20	0																													1	32	3	4	3
6	2015-11-20	0																													0
6	2015-11-20	0																													0
6	2015-11-20	1	9	2	2	3																									0
6	2015-11-23	0																													0
6	2015-11-23	0																													0
6	2015-12-03	0																													0
6	2015-12-03	0																													1	6	1	2	3
6	2015-12-03	0																													0
6	2015-12-03	0																													0
6	2015-12-03	0																													1
6	2015-12-03	1	25	2	4	3																									1	6	3	4	3
6	2015-12-03	1	13	3	4	3	8	3	4	3																					0
6	2015-12-03	0																													1	14	1	3	2
6	2015-12-03	0																													0
7	2015-10-05	0																													0
7	2015-10-05	0																													1	9	2	4				2	3
7	2015-10-05	0																													0
7	2015-10-05	0																													1	9	2	4	3	21
7	2015-10-05	0																													0
7	2015-10-05	1	39	2	1	1																									1	17	3	4	2	25	3	4	2
7	2015-10-05	0																													0
7	2015-10-05	0																													0
7	2015-10-05	0																													0
7	2015-10-05	0																													0
7	2015-10-05	0																													0
7	2015-10-05	0																													0
7	2015-10-05	1	17	2	2	3																									1	2	2	1	1
7	2015-10-05	1	14	2	2	3	4	2	2	3	6	2	2	3																	1	21	3	3	2
7	2015-10-05	0																													0
7	2015-10-05	0																													1	21	3	4	3	6	2	1	1
7	2015-10-05	0																													0
7	2015-10-05	1	41	3	1	1																									0
7	2015-10-05	0																													0
7	2015-10-05	1	17	1	1	1																									0
7	2015-10-05	1	14	3	1	1	17	3	1	1																					0
7	2015-10-05	1	14	3	1	1																									1	30	2	3	2
7	2015-10-05	1	9	2	3	3	6	2	3	3																					1	14	3	2	3
7	2015-10-05	1	14	3	1	1	8	3	3	2																					0
7	2015-10-05	0																													0
7	2015-10-05	0																													0
7	2015-10-05	0																													0
7	2015-10-05	0																													0
7	2015-10-05	1	1	2	3	3																									0
7	2015-10-05	0																													0
7	2015-10-06	0																													1	6	2	4	3
7	2015-10-06	1	11	3	1	1																									1	11	3	1	1
7	2015-10-06	1	41	1	3	2																									1	17	1	2	3
7	2015-10-06	0																													0
7	2015-10-06	0																													1	22	2	2	3
7	2015-10-06	0																													1	22	2	2	3
7	2015-10-06	0																													0
7	2015-10-06	0																													0
7	2015-10-06	0																													1	6	2	2	3	14	2	2	3
7	2015-10-06	0																													0
7	2015-10-06	0																													0
7	2015-10-06	0																													0
7	2015-10-06	0																													0
7	2015-10-06	0																													0
7	2015-10-06	1	29	3	1	1																									1	21	3	2	3
7	2015-10-06	1	8	2	3	2	23	2	2	2	9	2	3	2	21	2	2	2	13	2	3	2									1	14	3	3	2	2	3	3	2	30	3	3	2	32	3	3	2	6	3
7	2015-10-06	0																													0
7	2015-10-06	0																													0
7	2015-10-06	0																													1	2	2	3	2
7	2015-10-06	0																													1	14	2	2	3
7	2015-10-06	0																													0
7	2015-10-06	0																													0
7	2015-10-06	0																													0
7	2015-10-06	0																													0
7	2015-10-06	0																													0
7	2015-10-07	0																													0
7	2015-10-07	0																													0
7	2015-10-07	0																													0
7	2015-10-07	0																													1	25	2	3	3
7	2015-10-07	0																													1	32	3	1	3
7	2015-10-07	0																													0
7	2015-10-07	0																													0
7	2015-10-07	0																													0
7	2015-10-07	0																													1	14	3	4	2
7	2015-10-07	1	17	3	2	3	3	3	2	3																					1	14	3	2	3				3	3	3	2	3
7	2015-10-07	0																													1	4	3	4	3	14	3	4	3	2	3	4	3
7	2015-10-07	0																													1	21	2	2	3
7	2015-10-07	0																													1	14	2	4	3
7	2015-10-07	0																													0
7	2015-10-07	0																													0
7	2015-10-07	1	26	3	1	1	25	3	1	1	2	1	1	1																	1	14	2	4	3
7	2015-10-07	0																													0
7	2015-10-07	1	9	2	1	1																									1	14	3	1	1
7	2015-10-07	0																													0
7	2015-10-07	0																													0
7	2015-10-07	0																													0
7	2015-10-07	0																													0
7	2015-10-08	0																													0
7	2015-10-08	1	9	3	4	3																									1	8	3	2	3
7	2015-10-08	1	9	2	4	3
7	2015-10-08	0																													1	9	2	2	3	6	2	2	3
7	2015-10-08	1	8	3	1	1																									0
7	2015-10-08	0																													0
7	2015-10-08	0																													0
7	2015-10-08	0																													0
7	2015-10-08	0																													0
7	2015-10-08	0																													0
7	2015-10-08	1	9	2	4	3	14	2	4	3
7	2015-10-08	0																													0
7	2015-10-08	0																													0
7	2015-10-08	1	9	2	1	1																									0
7	2015-10-08	0																													0
7	2015-10-08	0																													0
7	2015-10-08	0																													0
7	2015-10-08	0																													0
7	2015-10-08	0																													0
7	2015-10-08	0																													0
7	2015-10-08	0																													0
7	2015-10-09	0																													0
7	2015-10-09	0																													0
7	2015-10-09	0																													1	2	2	4	3
7	2015-10-09	1	14	3	3	2																									1	14	3	3	2
7	2015-10-09	0																													0
7	2015-10-09	1	14	3	2																										0
7	2015-10-09	0																													0
7	2015-10-09	0																													1	8	3	1	1	6	3	1	1
7	2015-10-09	0																													0
7	2015-10-09	0																													1	9	3	3	3
7	2015-10-09	0																													1	41	2	1	1
7	2015-10-09	0																													0
7	2015-10-09	0																													0
7	2015-10-09	0																													0
7	2015-10-09	0																													0
7	2015-10-09	0																													0
7	2015-10-09	0																													0
7	2015-10-09	0																													0
7	2015-10-09	0																													0
7	2015-10-09	0																													0
7	2015-10-09	0																													1	4	1	4	3	17	1	4	3
7	2015-10-09	0																													0
7	2015-10-09	0																													0
7	2015-10-09	1	9	2	1	1																									0
7	2015-10-12	0																													1	9	3	2	3
7	2015-10-12	0																													0
7	2015-10-12	0																													1	14	2	1	1
7	2015-10-12	0																													1	14	3	2	3
7	2015-10-12	0																													0
7	2015-10-12	0																													1	14	1	3	3
7	2015-10-12	0																													0
7	2015-10-12	0																													0
7	2015-10-12	0																													0
7	2015-10-12	0																													1	8	2	1	1
7	2015-10-12	0																													1	14	2	2	3
7	2015-10-12	0																													0
7	2015-10-12	1	4	1	1	1																									0
7	2015-10-12	0																													1	9	1	4	3
7	2015-10-12	0																													0
7	2015-10-12	0																													0
7	2015-10-12	0																													0
7	2015-10-12	0																													1	6	1	1	1
7	2015-10-12	1	14	3	3	3																									1	30	2	4	3
7	2015-10-12	1	6	3	1	3																									0
7	2015-10-12	0																													0
7	2015-10-12	1	29	3	1	1	40	3	1	1																					0
7	2015-10-13	0																													0
7	2015-10-13	0																													1	33	3	2	3
7	2015-10-13	0																													0
7	2015-10-13	0																													0
7	2015-10-13	0																													0
7	2015-10-13	0																													0
7	2015-10-13	0																													0
7	2015-10-13	0																													0
7	2015-10-13	0																													1	21	3	1	3	14	3	2	3
7	2015-10-13	1	25	2	3	3																									1	17	3	1	1
7	2015-10-13	0																													0
7	2015-10-13	0																													1	9	3	4	3
7	2015-10-13	0																													1	9	3	1	1
7	2015-10-13	1	6	2	1	1																									1	32	2	4	3
7	2015-10-13	0																													0
7	2015-10-13	1	4	2	4	3																									1	14	3	2	3
7	2015-10-13	0																													1	14	3	3	3
7	2015-10-13	1	8	2	3	3																									1	39	2	3	3	29	2	3	3
7	2015-10-13	0																													0
7	2015-10-13	0																													0
7	2015-10-13	0																													0
7	2015-10-13	0																													0
7	2015-10-13	0																													0
7	2015-10-14	0																													0
7	2015-10-14	1	29	2	3	2																									0
7	2015-10-14	1	8	1	2	3																									1	9	3	1	1
7	2015-10-14	0																													0
7	2015-10-14	1	9	2	1	1	8	2	1	1	25	2	1	1	18	2	1	1													0
7	2015-10-14	1	39	1	3	2	35	1	3	2																					1	41	3	1	1
7	2015-10-14	0																													0
7	2015-10-14	0																													0
7	2015-10-14	0																													0
7	2015-10-14	0																													0
7	2015-10-14	0																													1	4	2	1	1	28	3	2	3
7	2015-10-14	1	28	2	1	1																									1	21	3	1	1
7	2015-10-14	0																													0
7	2015-10-29	0																													1	41	2	4	3	9	2	1	1
7	2015-10-29	1	9	2	3	2	6	2	3	2																					1
7	2015-10-29	1	14	3	2	3	9	3	2	3																					1	8	2	4	3	12	2	3	2
7	2015-10-29	0																													0
7	2015-10-29	0																													0
7	2015-10-29	0																													1	9	2	2	3
7	2015-10-29	1	14	2	2	3																									0
7	2015-10-29	0																													0
7	2015-10-29	1	25	3	1	1	28	3	1	1																					1	9	3	1	1
7	2015-10-29	0																													0
7	2015-10-29	0																													0
7	2015-10-29	0																													0
7	2015-10-29	0																													0
7	2015-10-29	0																													0
7	2015-10-29	0																													0
7	2015-10-30	1	20	2	4	3																									0
7	2015-10-30	0																													0
7	2015-10-30	0																													0
7	2015-10-30	0																													0
7	2015-10-30	0																													0
7	2015-10-30	0																													1	14	3	4	3	17	3	4	3
7	2015-10-30	1	6	2	4	3																									0
7	2015-10-30	0																													0
7	2015-10-30	1	9	2	1	1																									0
7	2015-10-30	0																													0
7	2015-10-30	1	14	1	3																										1	14	2	2	3	17	2	2	3
7	2015-10-30	1	30	2	3	2	9	2	1	1																					0
7	2015-11-16	1	33	1	1	1																									0
7	2015-11-16	0																													0
7	2015-11-16	0																													1	6	3	4	3	14	3	3	2	8	3	2	3
7	2015-11-16	1	6	2	3	3																									1	14	3	3	2	15	2	3	2	17	3	3	2	6	3	3	2
7	2015-11-16	0																													0
7	2015-11-16	0																													0
7	2015-11-16	0																													0
7	2015-11-17	1	4	2	4	3	32	2	3	2																					1	32	3	3	2
7	2015-11-17	0																													0
7	2015-11-17	1	9	3	3	2	8	3	3	2	41	3	3	2																	1	13	3	4	3
7	2015-11-17	0																													0
7	2015-11-17	0																													0
7	2015-11-17	1	26	2	3	3	29	2	1	1																					0
7	2015-11-19	0																													0
7	2015-11-19	0																													0
7	.	1	14	3	1	1	25	3	3	2																					0
8	2015-10-26	1	29	2	4	3																									0
8	2015-10-26	0																													0
8	2015-10-26	0																													0
8	2015-10-26	0																													0
8	2015-10-26	0																													0
8	2015-10-26	0																													0
8	2015-10-26	0																													0
8	2015-10-26	0																													0
8	2015-10-26	0																													1	14	3	4	3
8	2015-10-26	0																													1	14	3	4	3
8	2015-10-26	0																													0
[truncated: 373 more rows]
[truncated: 10 more columns]

## Sheet: Province Code
Code	Province
1	Eastern Cape
2	Free State
3	Gauteng
4	KwaZulu-Natal
5	Limpopo
6	Mpumalanga
7	North West
8	Northern Cape
9	Western Cape

## Sheet: Stockout Code
Code	Stockout
0	no
1	yes

## Sheet: Medicine Code
Code	Medicine
1	(D4T) Stavudine 30mg
2	(EFV) Efavirenz 600mg
3	(TDF)Tenofovir 300mg
4	TDF/FTC/EFV (FDC))Tenofovir/Emtricitabine/Efavirenz 300/200/600mg
5	(TDF/FTC)Tenofovir/ Emtricitabine 300mg/200mg
6	(3TC) Lamivudine 150 or 300 mg
7	(AZT/3TC) Zidovudine/Lamivudine 300/150mg
8	(AZT) Zidovudine 300mg
9	(LPV/r) Lopinavir/Ritonavir200mg/50mg
10	(ATV) Atazanavir 300mg
11	(DDi)(Didanosine)
12	(RTV) Ritonavir 100mg
13	(NVP) Nevirapine 200mg
14	(ABC) Abacavir 600mg
15	(ABC/3TC)Abacavir/Lamivudine 600/300mg
16	DRV Darunavir 600mg
17	(ABC) Abacavir 60mg or solution 20mg/ml
18	(AZT) Zidovudine 100mg
19	(RTV)Ritonavir 100mg_Ped
20	(3TC) Lamivudine solution 10mg/ml
21	(LPV/r) Lopinavir/Ritonavir solution 80/20mg/ml
22	(LPV/r) Lopinavir/Ritonavir 100mg/25mg
23	(AZT) Zidovudine solution 50mg/5ml
24	(D4T) Stavudine 15mg or 20 mg
25	(EFV) Efavirenz 200mg
26	(EFV) Efavirenz 50mg
27	(RTV) Ritonavir solution 80mg/ml
28	(NVP) Nevirapine solution 50mg/50ml
29	(R/H) Rifampicin/Isoniazid 150/75mg
30	(R/H) Rifampicin/Isoniazid 300/150mg -Rifinah/Rimactazid
31	(R/H) Rifampicine/Isoniazid 60/60mg
32	(RHZE) Rifampicine/Isonaizid /Pyrazinamid/Ethambutol– Rifafour
33	(Z PZA) Pyrazinamide 150mg
34	(Z PZA) Pyrazinamide 500mg
35	( E) Ethambutol 400mg
36	(Eto) Ethionamide
37	(Km) Kanamycin
38	(Lvx) Levofloxacin 250 or 500mg
39	Rifampicin capsules
40	Rifampicin suspension
41	(INH) Isoniazid tablets 300mg
42	Pyridoxine 25mg or 50mg

## Sheet: Length of Stockout Code
Code	Length of Stockout
1	less than 1 week
2	1-4 weeks
3	more than 4 weeks

## Sheet: Patient Impact Code
Code	Patient Impact
1	referred patients OR turned patients away
2	switched to a less optimal regimen
3	substituted by the same regimen but at a less optimal dosage OR a less optimal formulation OR pill burden increased
4	borrowed from another facility
5	dispensed only part of the formulations constituting a full regimen
6	switched appropriately to a different regimen, dosage or formulation

## Sheet: Supply Given Code
Code	Supply Given
1	with no medication
2	with smaller supply
3	with full supply
